# Supplementary material for: Ligand Installation to Polymeric Micelles for Pediatric Brain Tumor Targeting
Source: Polymers (Basel). 2023 Apr 6;15(7):1808. doi: 10.3390/polym15071808 (PMC10097392; doi:10.3390/polym15071808)
Supplement: Supplementary file 1 [file polymers-15-01808-s001.zip › polymers-2304596-supplementary.pdf]

# Supplementary Materials: Ligand Installation to Polymeric Micelles for Pediatric Brain Tumor Targeting

Takayoshi Watanabe <sup>1,†</sup>, Hayato Laurence Mizuno <sup>1,2,†</sup>, Jumpei Norimatsu <sup>1</sup>, Takumi Obara <sup>1</sup>, Horacio Cabral <sup>1</sup>, Kouhei Tsumoto <sup>1,3,4</sup>, Makoto Nakakido <sup>1,3</sup>, Daisuke Kawauchi <sup>2,\*</sup>, and Yasutaka Anraku <sup>1,5,\*</sup>

<sup>1</sup> Department of Bioengineering, Graduate School of Engineering, The University of Tokyo, 7-3-1 Hongo, Bunkyo-ku, Tokyo 113-8656, Japan

<sup>2</sup> Department of Biochemistry and Cellular Biology, National Center of Neurology and Psychiatry (NCNP), Tokyo 187-8551, Japan

<sup>3</sup> Department of Chemistry and Biotechnology, School of Engineering, The University of Tokyo, Tokyo 113-8654, Japan

<sup>4</sup> Medical Proteomics Laboratory, The Institute of Medical Science, The University of Tokyo, Tokyo 113-8654, Japan

<sup>5</sup> Department of Materials Science and Engineering, School of Materials and Chemical Technology, Tokyo Institute of Technology, Tokyo 152-8550, Japan

\* Correspondence: d.kawauchi@ncnp.go.jp (D.K.); anraku0915@g.ecc.u-tokyo.ac.jp (Y.A.)

† These authors contributed equally to this work.

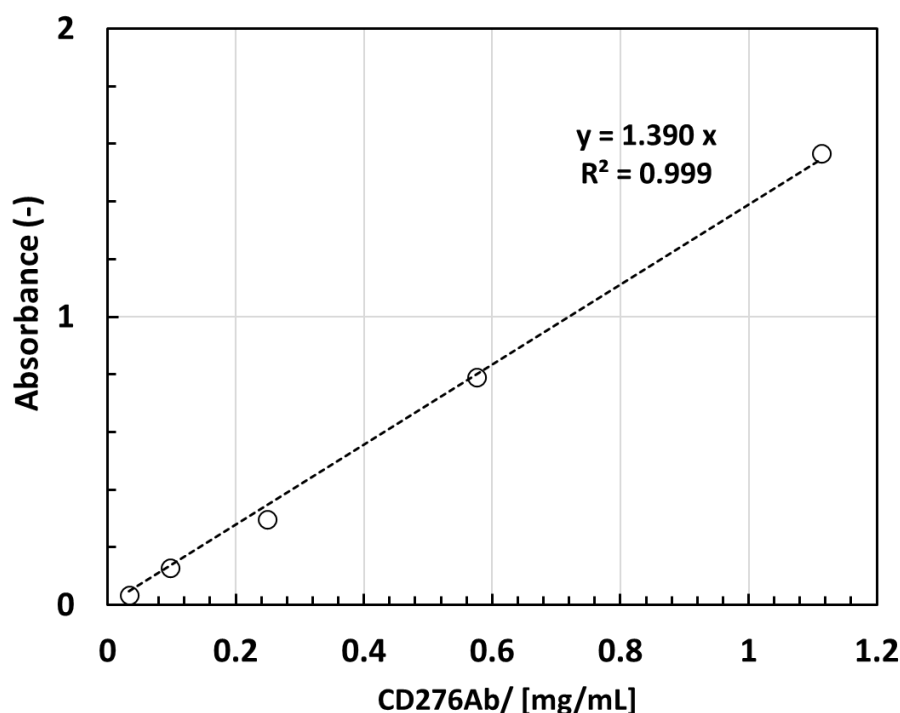

**Figure S1.** Calibration curve showing the linear range of CD276Ab's absorbance at 280 nm in relation to its concentration. Linearity was detected up to 1.1 mg/m with and  $R^2$  of 0.999.

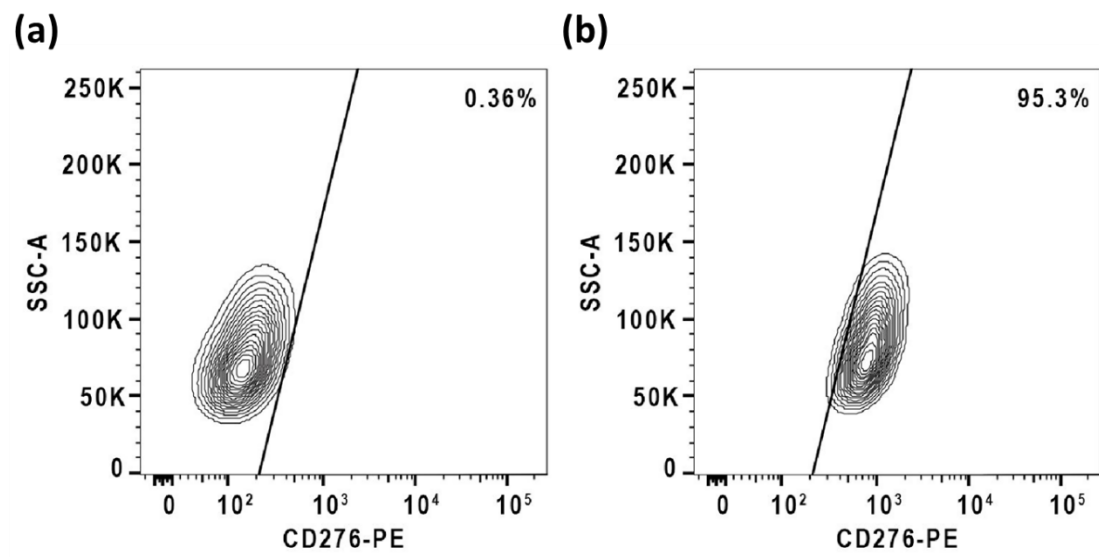

**Figure S2.** Counter plot of DAOY cells with isotype (A) and a PE-conjugated anti-CD276 antibody (B).

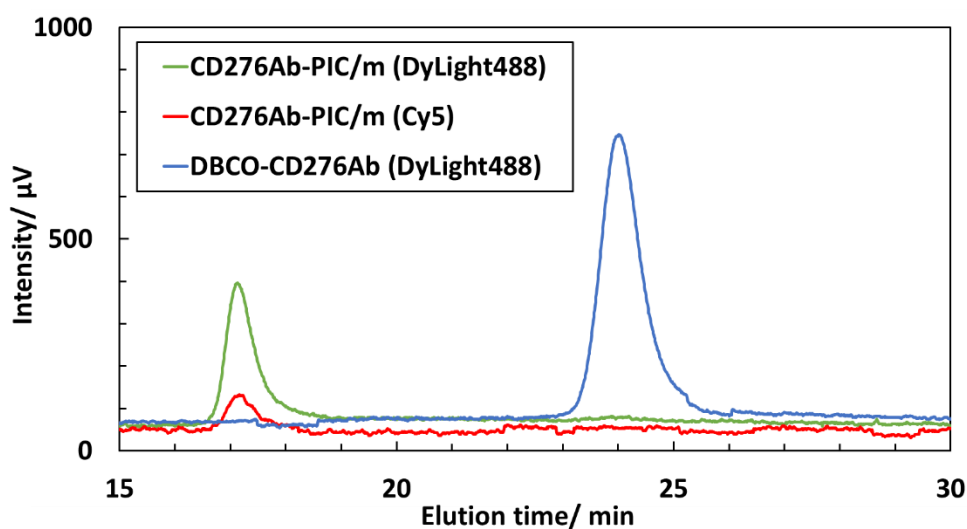

**Figure S3.** Chromatogram traces of CD276Ab-PIC/m (green), CD276Ab-PIC/m (red), and DBCO-CD276Ab (blue). The fluorescence of DyLight 488 conjugated to the CD275Ab was used for the detection of CD276Ab-PIC/m and DBCO-CD276Ab (Excitation: 493 nm, emission: 518 nm), while the fluorescence derived from Cy5 was used for the detection of CD276Ab-PIC/m (Excitation: 643 nm, emission: 667 nm). Flow rate: 0.5 mL/min, eluent: 10 mM phosphate buffer (pH 7.4), 500 mM NaCl.

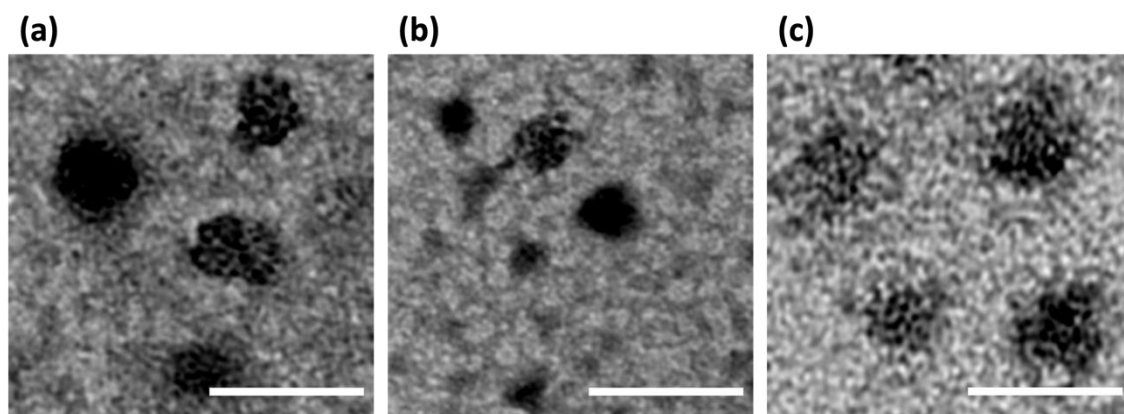

**Figure S4.** TEM images of (a) N<sub>3</sub>-PIC/m, (b) CD276Ab(1)-PIC/m, and (c) CD276Ab(2)-PIC/m. Scale bars indicate 50 nm.

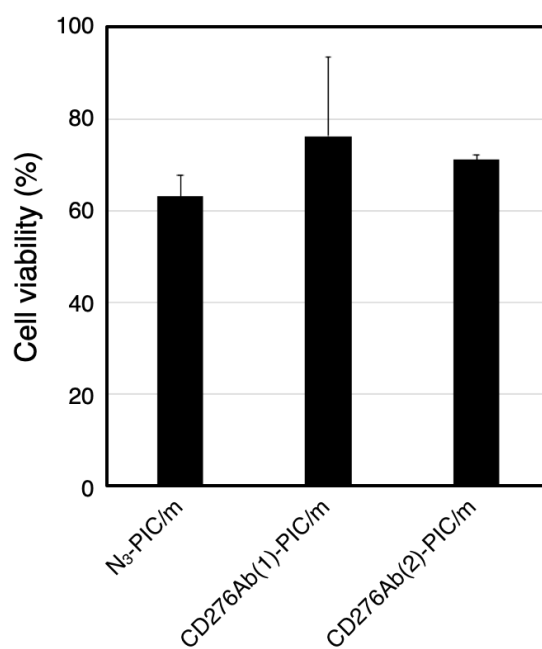

**Figure S5.** Viability of DAOY cells incubated with N<sub>3</sub>-PIC/m, CD276Ab(1)-PIC/m, and CD276Ab(2)-PIC/m.
